# Supplementary material for: Versatile organic photovoltaics with a power density of nearly 40 W g−1
Source: Royal Society of Chemistry journal article supplement (doi:10.1039/d3ee00087g), 2023-01-01
Supplement: d3ee00087g1.pdf [file d3ee00087g1.pdf]

Electronic Supplementary Information for:

## **Versatile organic photovoltaics with a power density of nearly 40 W g<sup>-1</sup>**

*Xiangjun Zheng,<sup>a</sup> Lijian Zuo,\*<sup>a,b</sup> Kangrong Yan,<sup>a</sup> Shiqi Shan,<sup>a</sup> Tianyi Chen,<sup>a</sup> Guanyu Ding,<sup>a</sup> Bowei Xu,<sup>c</sup> Xi Yang,<sup>d</sup> Jianhui Hou,<sup>c</sup> Minmin Shi,\*<sup>a</sup> and Hongzheng Chen\*<sup>a</sup>*

<sup>a</sup> State Key Laboratory of Silicon Materials, MOE Key Laboratory of Macromolecular Synthesis and Functionalization, Department of Polymer Science and Engineering, Zhejiang University, Hangzhou 310027, P. R. China.

<sup>b</sup> Zhejiang University-Hangzhou Global Scientific and Technological Innovation Center, Hangzhou 310014, P. R. China.

<sup>c</sup> State Key Laboratory of Polymer Physics and Chemistry, Beijing National Laboratory for Molecular Sciences, Institute of Chemistry, Chinese Academy of Sciences, Beijing 100190, P. R. China.

<sup>d</sup> ChasingLight Technology Co., Ltd, Guangzhou 510700, P. R. China

E-mail: [zjuzlj@zju.edu.cn](mailto:zjuzlj@zju.edu.cn); [minminshi@zju.edu.cn](mailto:minminshi@zju.edu.cn); [hzchen@zju.edu.cn](mailto:hzchen@zju.edu.cn)

## Supplementary Figures

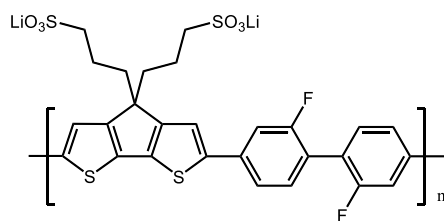

**Figure S1.** The chemical structure of PCP-2F-Li

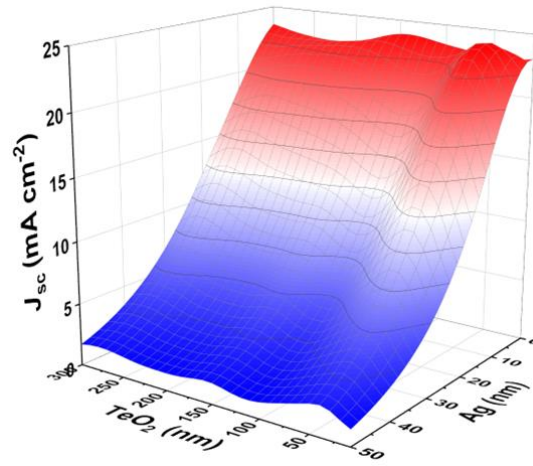

**Figure S2.** Optical simulation results of the ultra-thin Ag and  $\text{TeO}_2$  thickness-dependent  $J_{sc}$ .

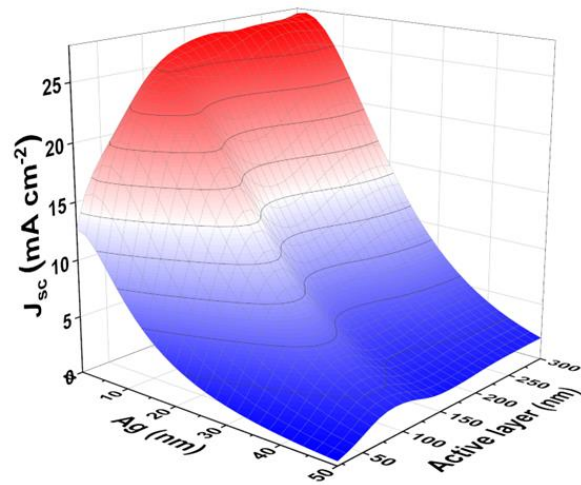

**Figure S3.** Optical simulation results of the ultra-thin Ag and active layer thickness-dependent  $J_{sc}$ .

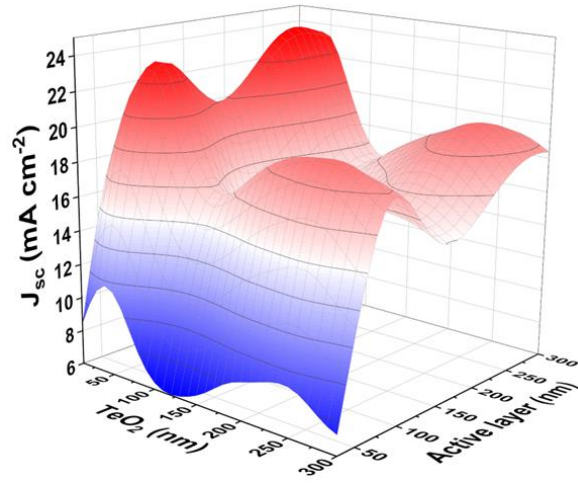

**Figure S4.** Optical simulation results of the active layer and  $\text{TeO}_2$  thickness-dependent  $J_{sc}$ .

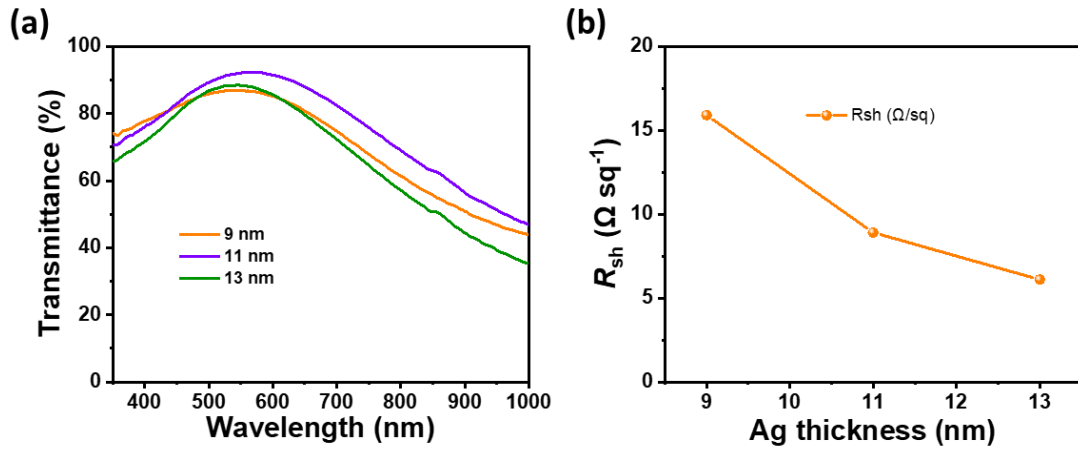

**Figure S5.** (a) Transmittances and (b) sheet resistances of ultra-thin Ag films with different thicknesses.

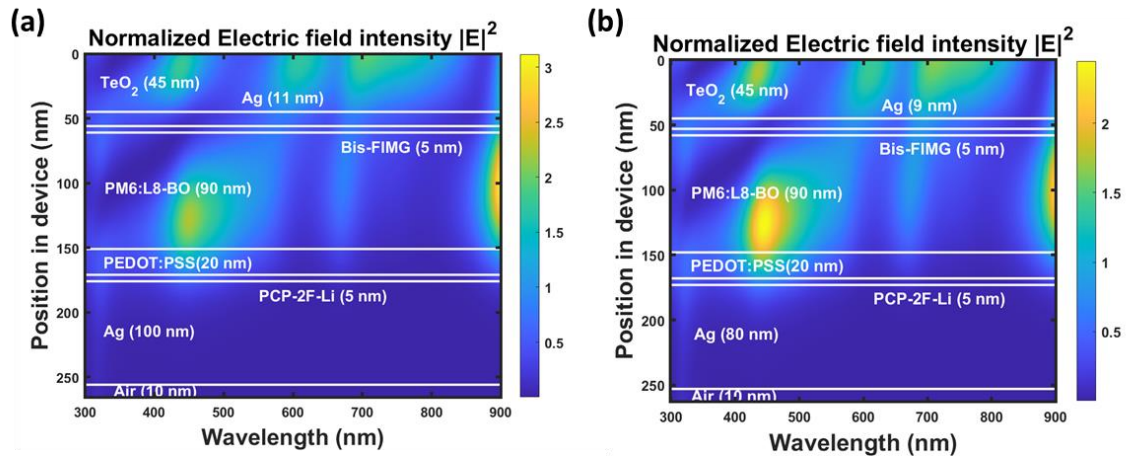

**Figure S6.** Optical simulation results of optical micro-cavity in the device chamber based on (a) 11 nm and (b) 9 nm ultra-thin Ag.

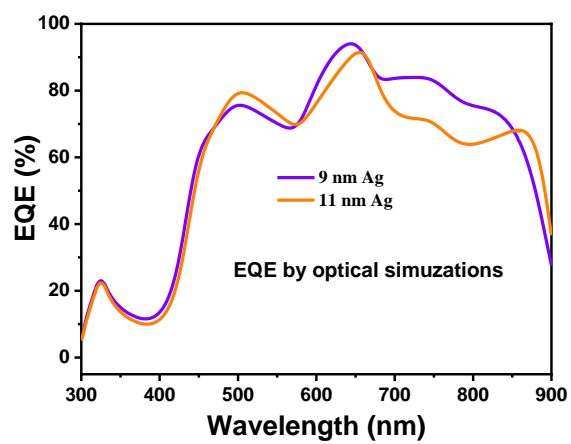

**Figure S7.** EQE spectra obtained by optical simulations based on 9 nm and 11 nm ultra-thin Ag films.



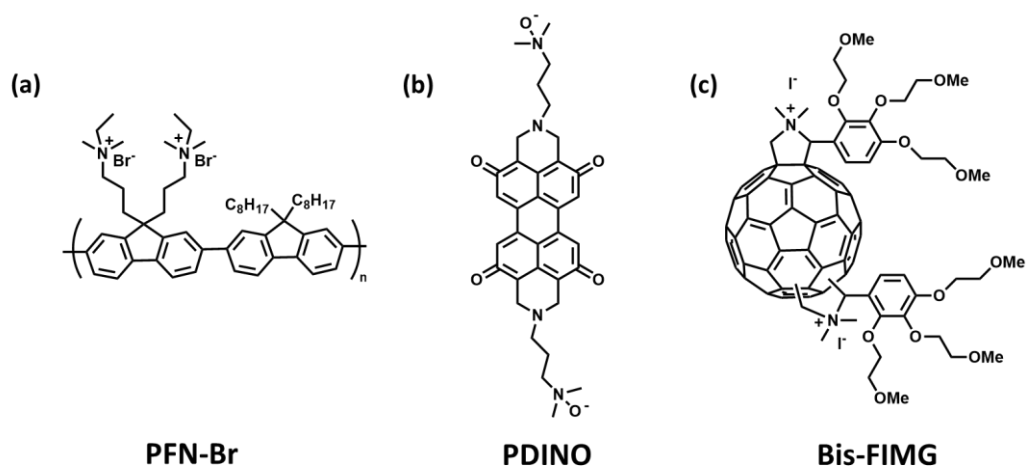

**Figure S8.** The chemical structures of (a) PFN-Br, (b) PDINO and (c) Bis-FIMG.

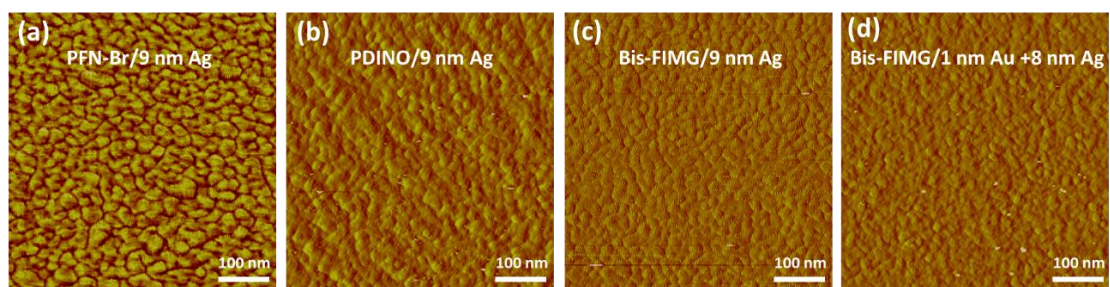

**Figure S9.** The phase images of (a) PFN-Br/9 nm Ag, (b) PDINO/9 nm Ag, (c) Bis-FIMG/9 nm Ag and (d) Bis-FIMG/1 nm Au/8 nm Ag films.

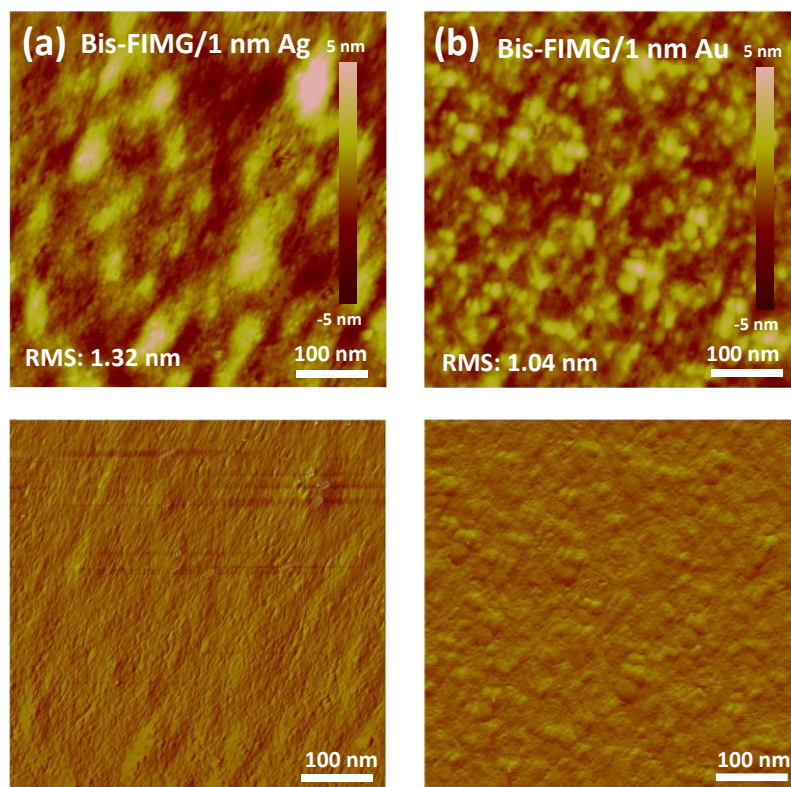

**Figure S10.** The AFM images (top: height, bottom: phase) of (a) Bis-FIMG/1 nm Ag, (b) Bis-FIMG/1 nm Au films.

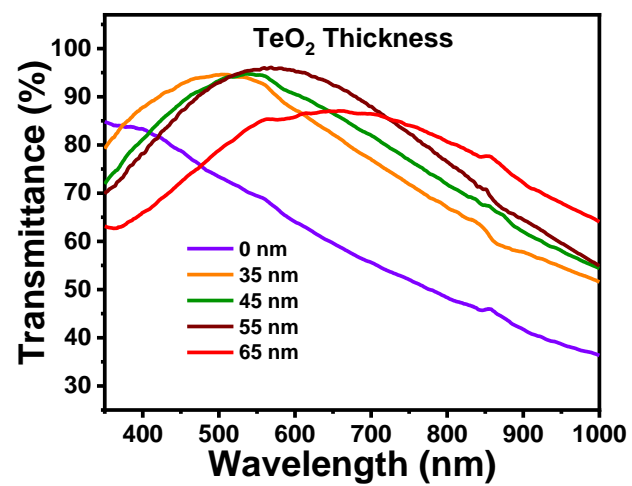

**Figure S11.** The transmittances of 0 nm, 35 nm, 45 nm, 55nm and 65 nm TeO<sub>2</sub> films.

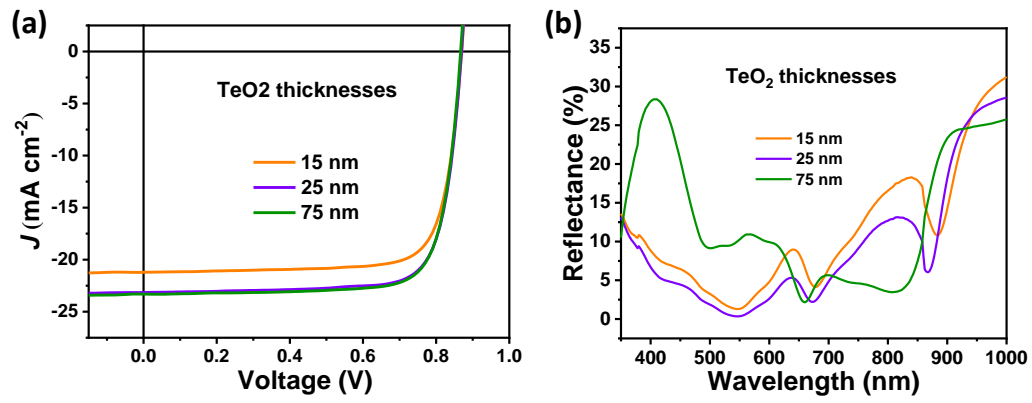

**Figure S12.** (a) J-V characteristics and (b) reflectance spectra of TUA-based devices with 15 nm, 25 nm and 75 nm TeO<sub>2</sub>.

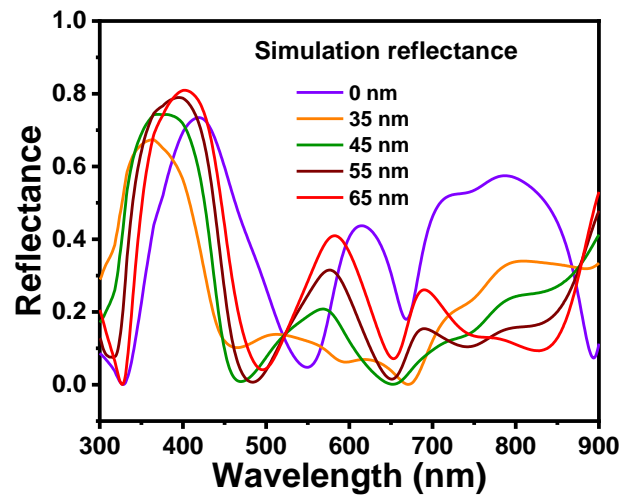

**Figure S13.** The simulated optical reflectance of 0 nm, 35 nm, 45 nm, 55nm and 65 nm TeO<sub>2</sub> based OPV devices.

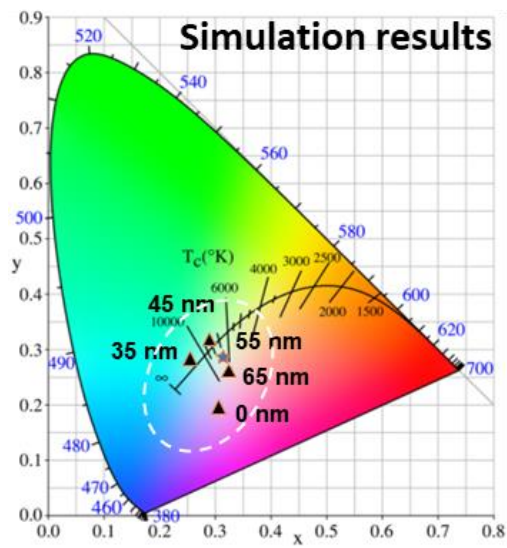

**Figure S14.** The color coordinates of the corresponding devices with different  $\text{TeO}_2$  thicknesses based on simulation results.

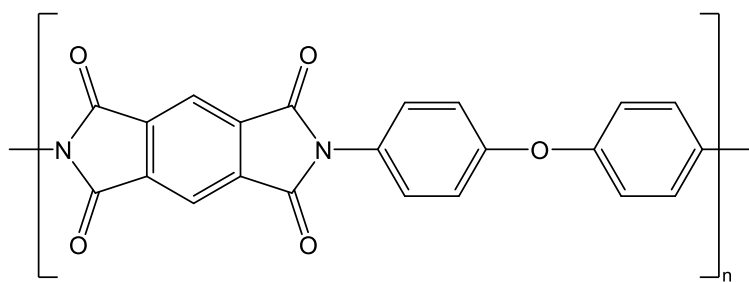

**Polyimide**

**Figure S15.** The chemical structure of polyimide.



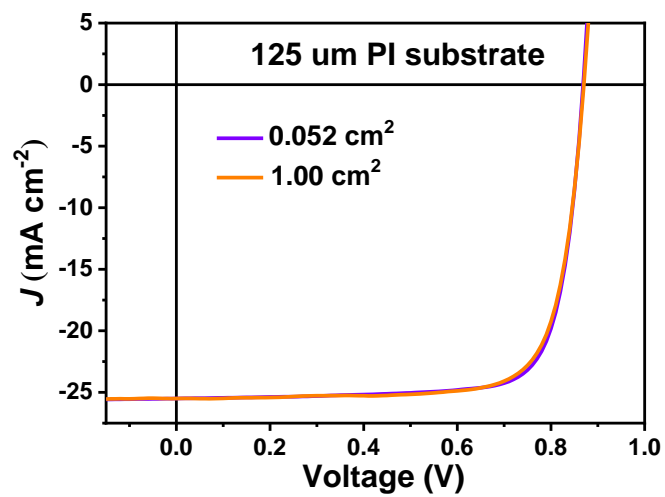

**Figure S16.** The  $J$ - $V$  characteristics of 0.052 cm<sup>2</sup> and 1.00 cm<sup>2</sup> flexible OPVs based on 125 μm PI as substrate.

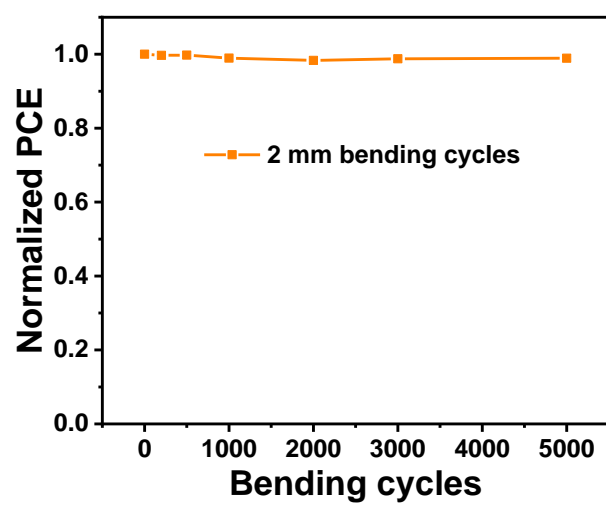

**Figure S17.** Normalized PCEs of 2 mm bending-tested flexible OPV device based on 125 μm PI as substrate.

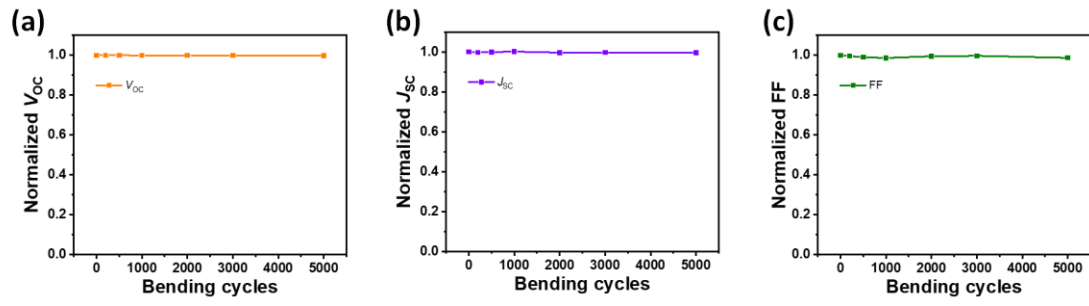

**Figure S18.** Normalized (a)  $V_{oc}$ , (b)  $J_{sc}$  and (c) FFs of 2 mm bending-tested flexible OPV devices based on 125  $\mu\text{m}$  PI as substrate.

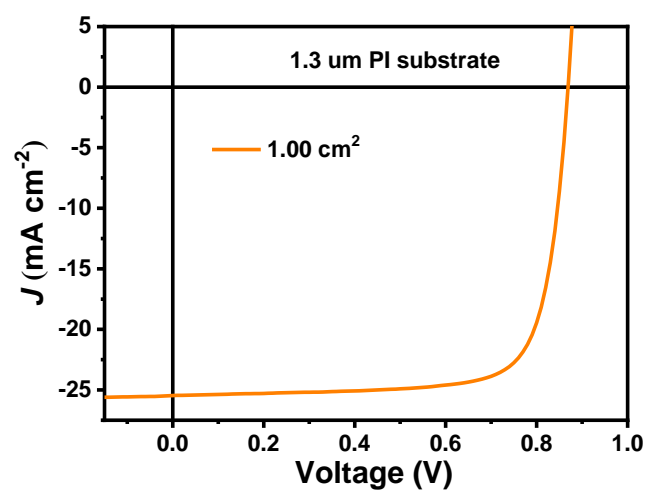

**Figure S19.** The  $J$ - $V$  characteristics of  $1.00 \text{ cm}^2$  ultra-flexible OPV device based on  $1.3 \text{ }\mu\text{m}$  PI as substrate.

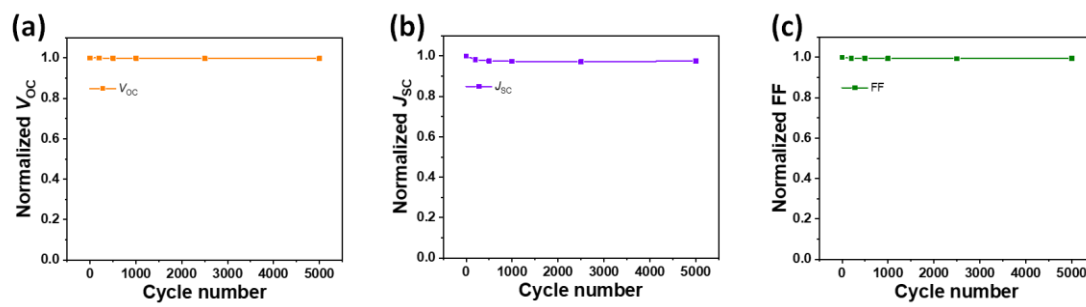

**Figure S20.** Normalized (a)  $V_{oc}$ , (b)  $J_{sc}$  and (c) FFs of compression-stretching deformation cycles with 30% compression of the ultra-flexible OPV.

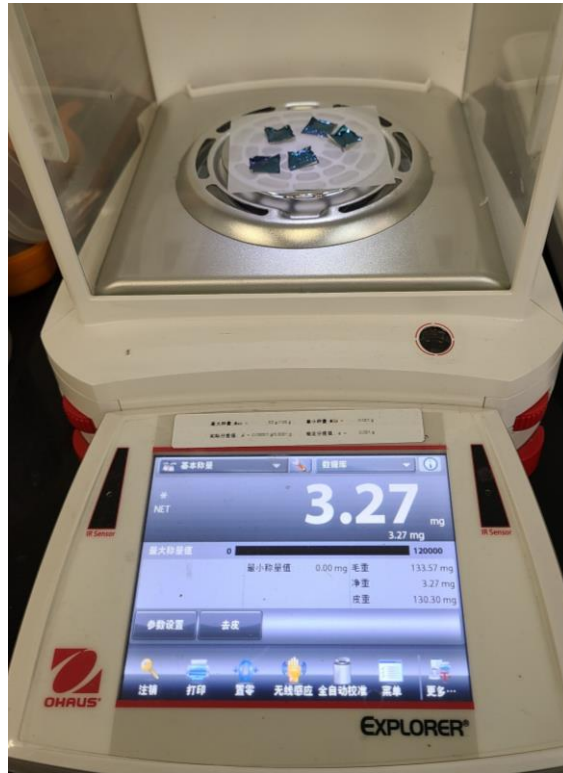

**Figure S21.** The weight of five 1.5 cm by 1.5 cm sizes ultra-flexible OPVs.

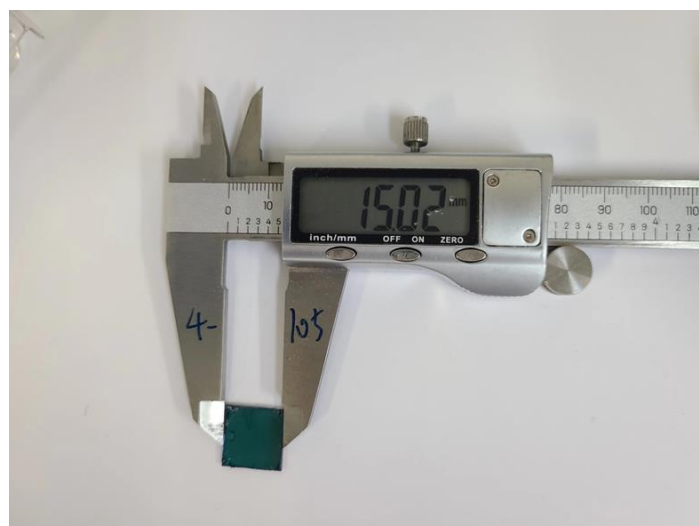

**Figure S22.** The length measurement of 1.5 cm by 1.5 cm sizes ultra-flexible OPVs (unpeeling off).

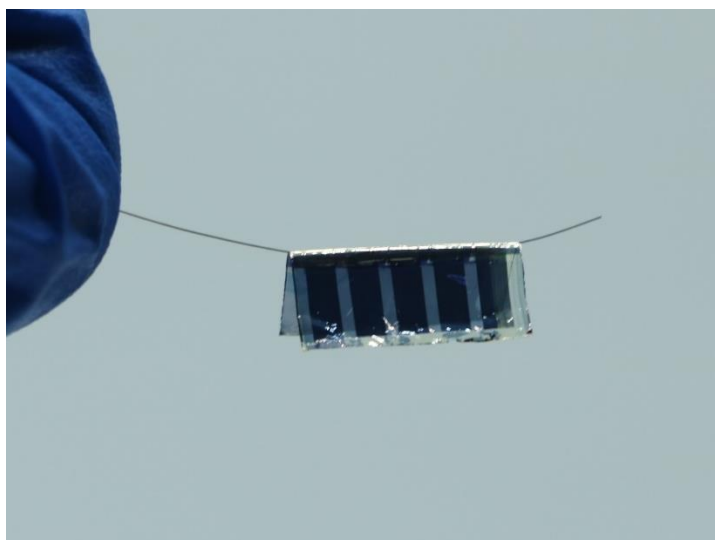

**Figure S23.** The display of an ultra-flexible OPV device on a single human hair.



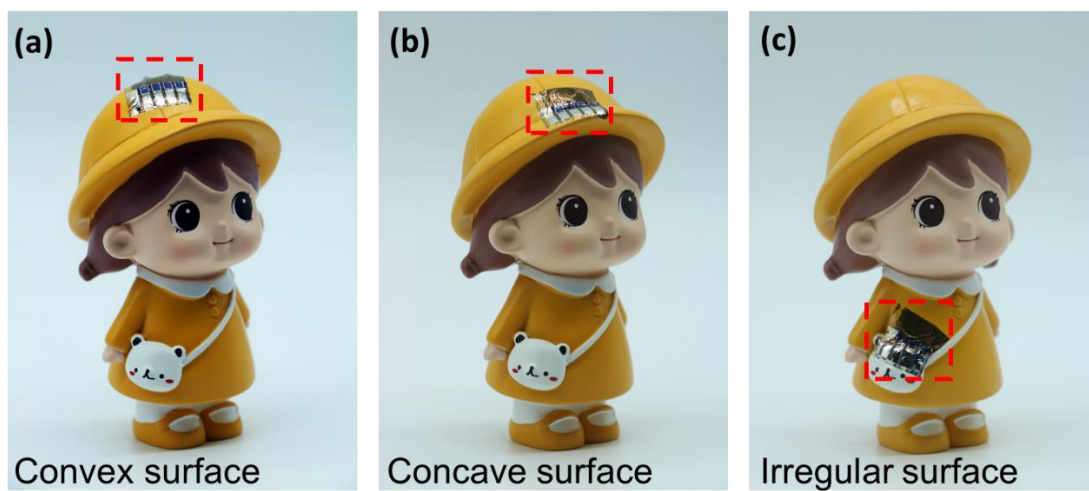

**Figure S24.** The display of ultra-flexible OPV device on the concave, convex, and irregular surfaces.

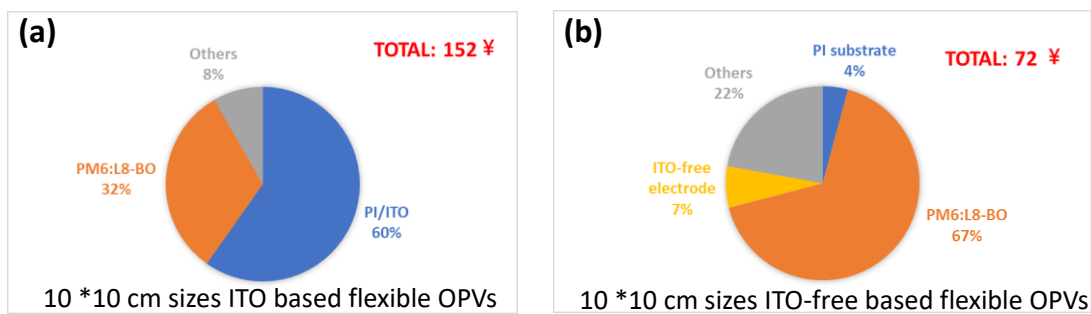

**Figure S25.** The cost analysis of (a) ITO and (b) ITO-free (Au/Ag) based 10\*10 cm sizes flexible OPV devices.

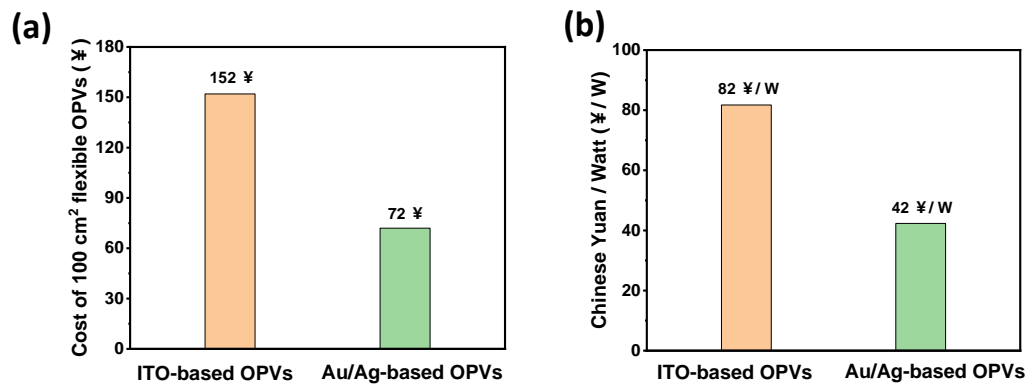

**Figure S26.** (a) The cost statistics of ITO and ITO-free (Au/Ag) based 10\*10 cm sizes flexible OPV devices. (b) The cost-watt (¥/W) statistics of ITO-based and Au/Ag-Based flexible OPVs.

## Supplemental Tables

**Table S1.** Transmittances, sheet resistances, and photovoltaic performances of 0.052 cm<sup>2</sup> devices with different ultra-thin Ag thicknesses. The  $\pm$  refers to the standard deviation.

| Ag thicknesses [nm] | Sheet resistance [ $\Omega$ /sq] | Transmittance at 565 nm [%] | V <sub>oc</sub> [V] | J <sub>sc</sub> [mA cm <sup>-2</sup> ] | J <sub>cal</sub> [mA cm <sup>-2</sup> ] | FF [%] | PCE [%]                     |
|---------------------|----------------------------------|-----------------------------|---------------------|----------------------------------------|-----------------------------------------|--------|-----------------------------|
| 9                   | 15.9                             | 86.7                        | 0.869               | 24.06                                  | 23.41                                   | 76.75  | 16.01<br>(15.86 $\pm$ 0.13) |
| 11                  | 8.9                              | 92.5                        | 0.870               | 24.97                                  | 24.29                                   | 78.34  | 17.02<br>(16.89 $\pm$ 0.08) |
| 13                  | 6.1                              | 88.3                        | 0.869               | 23.15                                  | 22.78                                   | 78.49  | 15.79<br>(15.68 $\pm$ 0.09) |

**Table S2.** Photovoltaic performances of the rigid OPVs with different ETLs and transparent electrodes. The  $\pm$  refers to the standard deviation.

| ETLs     | Transparent electrodes | Area [cm <sup>2</sup> ] | V <sub>oc</sub> [V] | J <sub>sc</sub> [mA cm <sup>-2</sup> ] | J <sub>calc.</sub> [mA cm <sup>-2</sup> ] | FF [%] | PCE [%]               |
|----------|------------------------|-------------------------|---------------------|----------------------------------------|-------------------------------------------|--------|-----------------------|
| PFN-Br   | 9 nm Ag                | 0.052                   | 0.767               | 21.03                                  | 20.44                                     | 63.22  | 10.20<br>(9.79±0.27)  |
| PDINO    | 9 nm Ag                | 0.052                   | 0.795               | 23.91                                  | 23.46                                     | 59.19  | 11.28<br>(10.85±0.32) |
| Bis-FIMG | 9 nm Ag                | 0.052                   | 0.869               | 24.06                                  | 23.41                                     | 76.75  | 16.01<br>(15.86±0.13) |
| Bis-FIMG | 1 nm Au / 8 nm Ag      | 0.052                   | 0.870               | 25.52                                  | 24.96                                     | 78.87  | 17.50<br>(17.45±0.05) |
| Bis-FIMG | 1 nm Au / 8 nm Ag      | 1.00                    | 0.869               | 25.59                                  | -                                         | 77.36  | 17.20<br>(17.04±0.15) |

**Table S3.** Photovoltaic performances of the flexible OPV tested by bending cycles with a radius of 2 mm based on 125  $\mu\text{m}$  PI as substrate.

| Bending cycles<br>[times] | $V_{oc}$<br>[V] | $J_{sc}$<br>[mA/cm <sup>2</sup> ] | FF<br>[%] | PCE<br>[%] |
|---------------------------|-----------------|-----------------------------------|-----------|------------|
| 0                         | 0.861           | 25.49                             | 77.56     | 17.02      |
| 200                       | 0.860           | 25.41                             | 77.25     | 16.90      |
| 500                       | 0.861           | 25.46                             | 76.79     | 16.83      |
| 1000                      | 0.860           | 25.53                             | 76.53     | 16.81      |
| 2000                      | 0.861           | 25.39                             | 77.17     | 16.86      |
| 3000                      | 0.860           | 25.42                             | 77.34     | 16.91      |
| 5000                      | 0.859           | 25.38                             | 76.57     | 16.72      |

**Table S4.** Photovoltaic performances and colors of the rigid OPVs with 15 nm, 25 nm and 75 nm TeO<sub>2</sub>. The  $\pm$  refers to the standard deviation.

| TeO <sub>2</sub> thicknesses [nm] | Device color                                                                      | Color coordinate  | V <sub>oc</sub> [V] | J <sub>sc</sub> [mA cm <sup>-2</sup> ] | FF [%] | PCE [%]                     |
|-----------------------------------|-----------------------------------------------------------------------------------|-------------------|---------------------|----------------------------------------|--------|-----------------------------|
| 15                                |  | 0.3524,<br>0.2284 | 0.870               | 21.21                                  | 78.24  | 14.43<br>(14.15 $\pm$ 0.16) |
| 25                                |  | 0.3359,<br>0.1926 | 0.870               | 23.15                                  | 78.43  | 15.80<br>(15.57 $\pm$ 0.14) |
| 75                                |  | 0.2756,<br>0.2459 | 0.867               | 23.29                                  | 78.70  | 15.90<br>(15.68 $\pm$ 0.13) |

**Table S5.** Photovoltaic performances of the ultra-flexible OPV tested by compression-stretching deformation cycles with 30% compression.

| Cycle number | $V_{oc}$ | $J_{sc}$              | FF    | PCE   |
|--------------|----------|-----------------------|-------|-------|
| [times]      | [V]      | [mA/cm <sup>2</sup> ] | [%]   | [%]   |
| 0            | 0.858    | 25.43                 | 77.63 | 16.94 |
| 200          | 0.858    | 24.97                 | 77.18 | 16.54 |
| 500          | 0.857    | 24.81                 | 77.32 | 16.44 |
| 1000         | 0.857    | 24.76                 | 77.20 | 16.38 |
| 2500         | 0.856    | 24.71                 | 77.12 | 16.31 |
| 5000         | 0.856    | 24.79                 | 77.26 | 16.39 |



**Table S6.** The statistical data for ultra-flexible OPVs.

| Substrate<br>thickness [ $\mu\text{m}$ ] | Area<br>[ $\text{cm}^2$ ] | Device structure                                                      | PCE<br>[%] | Ref.      |
|------------------------------------------|---------------------------|-----------------------------------------------------------------------|------------|-----------|
| 3.0                                      | 0.04                      | Parylene/SU8/ITO/ZnO/ PBDTTT-OFT:IEICO-                               | 13.0       | 1         |
| 3.0                                      | 1.0                       | 4F:PC <sub>71</sub> BM/MoO <sub>3</sub> /Ag                           | 11.6       | 1         |
| 6.0                                      | 0.0289                    | Ag NWs@PI-ZnO/ZnO/PM6:BTP-4Cl/MoO <sub>3</sub> /Ag                    | 13.55      | 2         |
| 7.0                                      | 0.0289                    | Ag NWs@HB-PI/ZnO/PM6:BTP-4Cl/MoO <sub>3</sub> /Ag                     | 13.52      | 3         |
| 3.0                                      | 0.04                      | Parylene/ITO/ZnO/PBDTTT-OFT: PC <sub>71</sub> BM/MoO <sub>3</sub> /Ag | 10.67      | 4         |
| 1.4                                      | 0.04                      | Parylene/ITO/ZnO/PBDTTT-OFT: IEICO-4F/PEDOT:PSS/Ag                    | 10.4       | 5         |
| 2.5                                      | 0.04                      | PET/D-PEDOT:PSS/PEDOT:PSS/PM6:Y6:PC71BM/PFNDI-<br>Br/Ag               | 15.5       | 6         |
| 1.0                                      | 0.04                      | Parylene/ITO/ZnO/PNTz4T: PC <sub>71</sub> BM/MoO <sub>3</sub> /Ag     | 7.9        | 7         |
| 3.0                                      | 0.04                      | Parylene/ITO/ZnO/PBDTTT-OFT: PC <sub>71</sub> BM/MoO <sub>3</sub> /Ag | 10.6       | 8         |
| 1.3                                      | 0.041                     | PEN/Ag NWs/PEI-Zn/PM6:IT-4F/MoO <sub>3</sub> /Ag                      | 10.4       | 9         |
| 1.3                                      | 0.041                     | PEN/PEDOT:PSS/PEI-Zn/PM6:IT-4F/MoO <sub>3</sub> /Ag                   | 12.9       | 9         |
| 1.3                                      | 0.041                     | PEN/Ag NWs/PEI-Zn/PM6:Y6/MoO <sub>3</sub> /Ag                         | 12.3       | 9         |
| 1.3                                      | 0.041                     | PEN/PEDOT:PSS/PEI-Zn/PM6:Y6/MoO <sub>3</sub> /Ag                      | 15.03      | 9         |
| 1.3                                      | 1.0                       | PEN/PEDOT:PSS/PEI-Zn/PM6:Y6/MoO <sub>3</sub> /Ag                      | 11.2       | 9         |
| 1.3                                      | 0.04                      | PI/ITO/ZnO/PTzNTz-BOBO:PC <sub>71</sub> BM/MoO <sub>3</sub> /Ag       | 9.3        | 10        |
| 3.0                                      | 0.04                      | tPI/ITO/PEI-Zn/PM6:Y6/MoO <sub>3</sub> /Ag                            | 15.8       | 11        |
| 1.3                                      | 0.052                     | PI/Ag/PCP-2F-Li/PEDOT:PSS/PM6:L8-BO/Bis-                              | 17.52      | This work |
| 1.3                                      | 1.0                       | FIMG/Au/Ag/TeO <sub>2</sub>                                           | 17.08      | This work |

**Table S7.** The statistical data of power-per-weight for difference PV technologies.

| PV technologies | Device structure                                                                      | PCE [%] | Power per weight [W g <sup>-1</sup> ] | Ref.      |
|-----------------|---------------------------------------------------------------------------------------|---------|---------------------------------------|-----------|
| GaAs            | Ga <sub>0.51</sub> In <sub>0.49</sub> P/GaAs/Ga <sub>0.73</sub> In <sub>0.27</sub> As | 30.9    | 3.0                                   | 12        |
| Quantum Dots    | PET/parylene/graphene/oCVD                                                            | 7.10    | 12.3                                  | 13        |
|                 | PEDOT/Pbs-EDT/Pbs-TBAI/LiF/Al                                                         |         |                                       |           |
| Perovskite      | Parylene/ITGZO/PTAA/Perovskite/PCB                                                    | 20.2%   | 30.3                                  | 14        |
|                 | M/BCP/Cu                                                                              |         |                                       |           |
| Organic         | tPI/ITO/PEI-Zn/PM6:Y6/MoO <sub>3</sub> /Ag                                            | 15.80   | 33.80                                 | 11        |
| Organic         | PI/Ag/PCP-2F-Li/PEDOT:PSS/PM6:L8-BO/Bis-FIMG/Au/Ag/TeO <sub>2</sub>                   | 17.32   | 39.72                                 | This work |

**Table S8.** The cost statistics of 10\*10 cm sizes ITO-based flexible OPV devices

| Materials | Price per unit          | Dosage              | Price (¥) | Content (%) |
|-----------|-------------------------|---------------------|-----------|-------------|
| PI/ITO    | 9000 ¥ / m <sup>2</sup> | 100 cm <sup>2</sup> | 90        | 59.2        |
| PEDOT:PSS | 1000 ¥/ 1000 mL         | 0.2 mL              | 2         | 1.3         |
| PM6       | 22000 ¥/ g              | 1.5 mg              | 33        | 21.7        |
| L8-BO     | 8000 ¥/ g               | 1.8 mg              | 15        | 9.9         |
| PDINN     | 7600 ¥/ g               | 0.2 mg              | 1.5       | 1.0         |
| Ag        | 7 ¥/ g                  | 0.64 g              | 4.5       | 3.0         |
| Others    | \                       | \                   | 6         | 3.9         |
| Total     | \                       | \                   | 152       | 100         |

**Table S9.** The cost statistics of 10\*10 cm sizes ITO-free flexible OPV devices.

| Materials        | Price per unit        | Dosage              | Price (¥) | Content (%) |
|------------------|-----------------------|---------------------|-----------|-------------|
| PI               | 300 ¥/ m <sup>2</sup> | 100 cm <sup>2</sup> | 3         | 4.2         |
| PEDOT:PSS        | 1000 ¥/ 1000 mL       | 0.2 mL              | 2         | 2.8         |
| PM6              | 22000 ¥/ g            | 1.5 mg              | 33        | 45.8        |
| L8-BO            | 8000 ¥/ g             | 1.8 mg              | 15        | 20.8        |
| Bis-FIMG         | 7600 ¥/ g             | 0.2 mg              | 1.5       | 2.1         |
| Ag               | 7 ¥/ g                | 0.7 g               | 4.9       | 6.8         |
| Au               | 500 ¥/ g              | 10 mg               | 5         | 6.9         |
| TeO <sub>2</sub> | 10 ¥/ g               | 10 mg               | 0.1       | 0.1         |
| PCP-2F-Li        | 8000 ¥/ g             | 0.2 mg              | 1.6       | 2.2         |
| Others           | \                     | \                   | 6         | 8.3         |
| Total            | \                     | \                   | 72.1      | 100         |

## Supplementary References

1. W. Huang, Z. Jiang, K. Fukuda, X. Jiao, C. R. McNeill, T. Yokota and T. Someya, *Joule*, 2020, **4**, 128.
2. Y. Wang, Q. Chen, G. Zhang, Y. Wang, Z. Zhang, J. Fang, C. Zhao and W. Li, *Chem. Eng. J.*, 2023, **451**, 138612.
3. Y. Wang, Q. Chen, Y. Wang, G. Zhang, Z. Zhang, J. Fang, C. Zhao and W. Li, *Macromol. Rapid Commun.*, 2022, 2200432.
4. S. Park, S. W. Heo, W. Lee, D. Inoue, Z. Jiang, K. Yu, H. Jinno, D. Hashizume, M. Sekino, T. Yokota, K. Fukuda, K. Tajima and T. Someya, *Nature*, 2018, **561**, 516.
5. S. I. Rich, S. Lee, K. Fukuda and T. Someya, *Adv. Mater.*, 2022, **34**, 2106683.
6. W. Song, K. Yu, E. Zhou, L. Xie, L. Hong, J. Ge, J. Zhang, X. Zhang, R. Peng and Z. Ge, *Adv. Funct. Mater.*, 2021, **31**, 2102694.
7. H. Jinno, K. Fukuda, X. Xu, S. Park, Y. Suzuki, M. Koizumi, T. Yokota, I. Osaka, K. Takimiya and T. Someya, *Nat. Energy*, 2017, **2**, 780.
8. H. Jinno, T. Yokota, M. Koizumi, W. Yukita, M. Saito, I. Osaka, K. Fukuda and T. Someya, *Nat. Commun.*, 2021, **12**, 2234.
9. F. Qin, W. Wang, L. Sun, X. Jiang, L. Hu, S. Xiong, T. Liu, X. Dong, J. Li, Y. Jiang, J. Hou, K. Fukuda, T. Someya and Y. Zhou, *Nat. Commun.*, 2020, **11**, 4508.
10. H. Kimura, K. Fukuda, H. Jinno, S. Park, M. Saito, I. Osaka, K. Takimiya, S. Umezumi and T. Someya, *Adv. Mater.*, 2019, **31**, 1808033.
11. S. Xiong, K. Fukuda, S. Lee, K. Nakano, X. Dong, T. Yokota, K. Tajima, Y. Zhou and T. Someya, *Adv. Sci.*, 2022, **9**, 2105288.
12. J. Schön, G. M. M. W. Bissels, P. Mulder, R. H. van Leest, N. Gruginskie, E. Vlieg, D. Chojniak and D. Lackner, *Prog. Photovoltaics*, 2022, **30**, 1003.
13. M. M. Tavakoli, M. H. Gharahcheshmeh, N. Moody, M. G. Bawendi, K. K. Gleason and J. Kong, *Adv. Mater. Interface*, 2020, **7**, 2000498.
14. J. Wu, P. Chen, H. Xu, M. Yu, L. Li, H. Yan, Y. Huangfu, Y. Xiao, X. Yang, L. Zhao, W. Wang, Q. Gong and R. Zhu, *Sci. China Mater.*, 2022, **65**, 2319.
